# Supplementary material
Source: PubMed Central journal article supplement (PMC6842422)

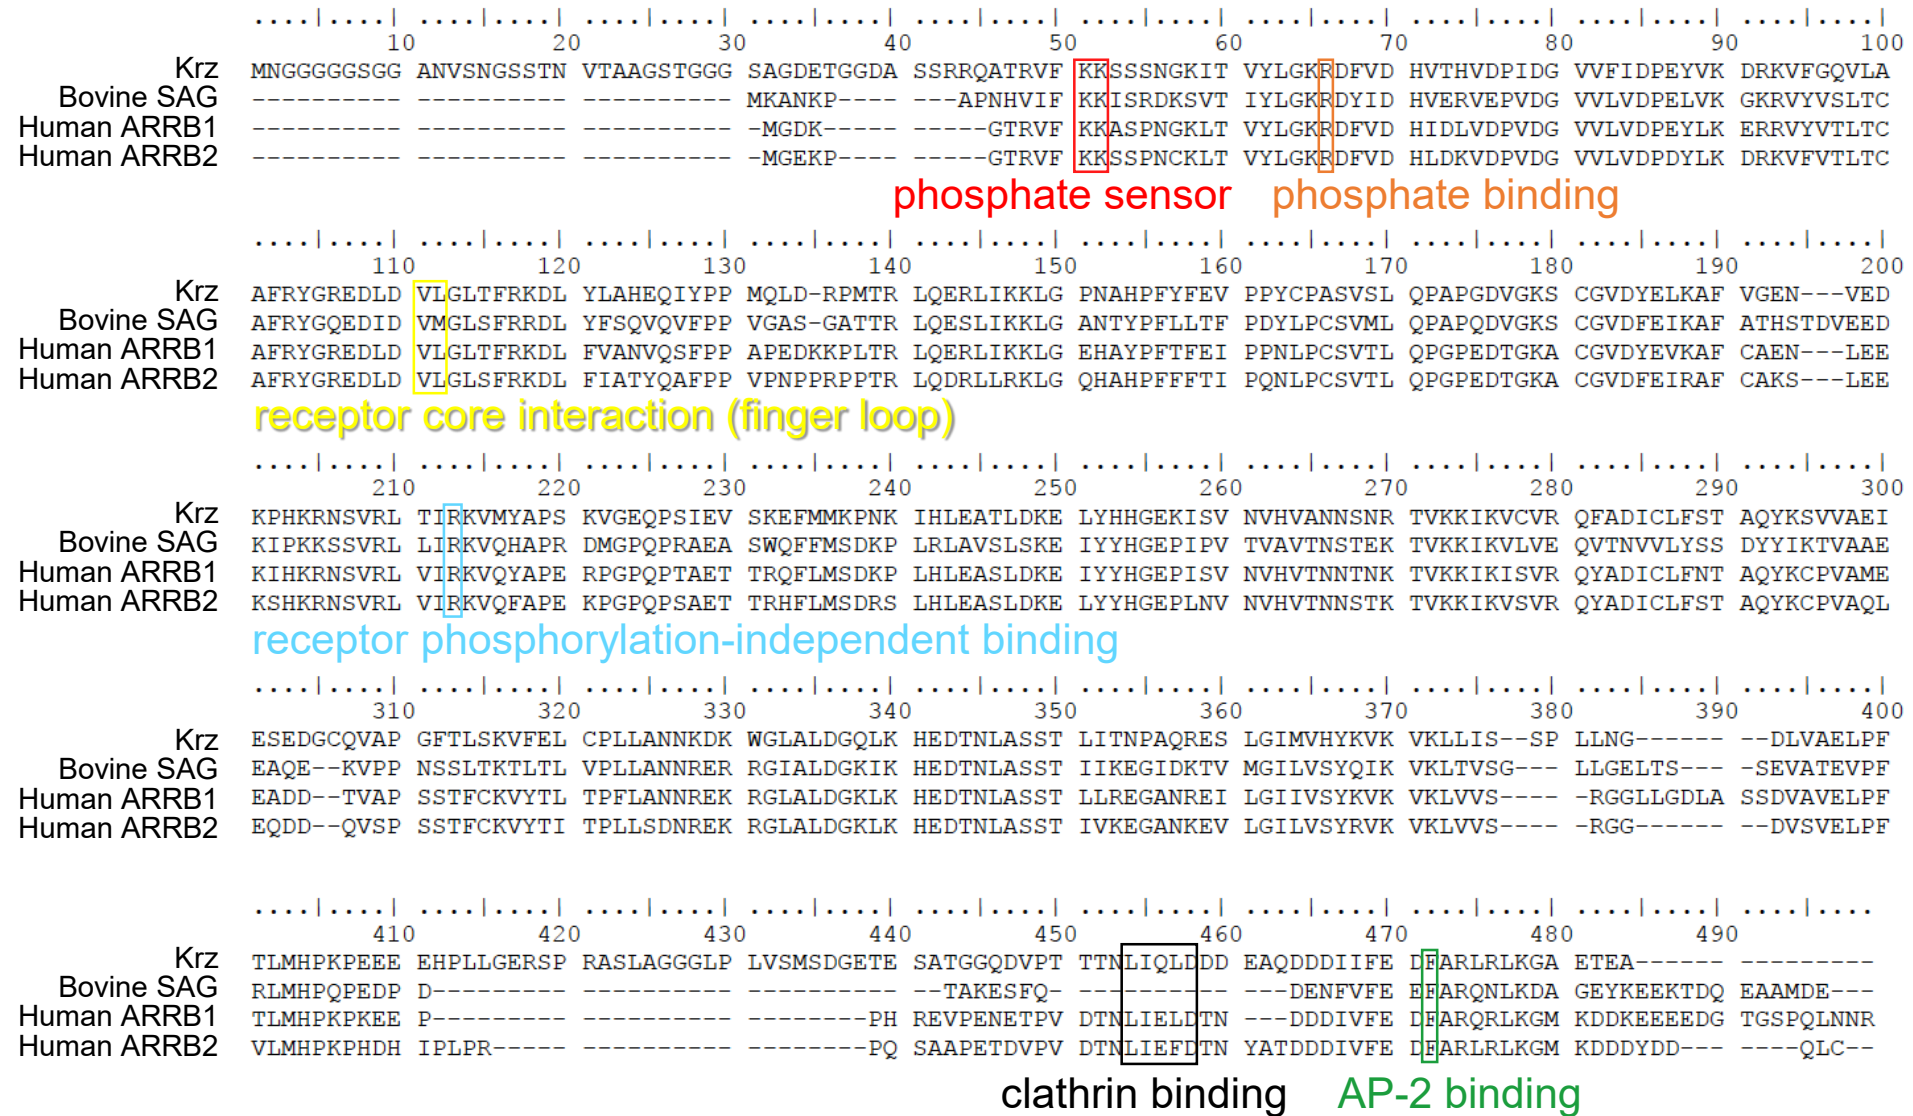

Fig. S1

Supplement: NIHMS1535480-supplement-3.pdf [file NIHMS1535480-supplement-3.pdf]

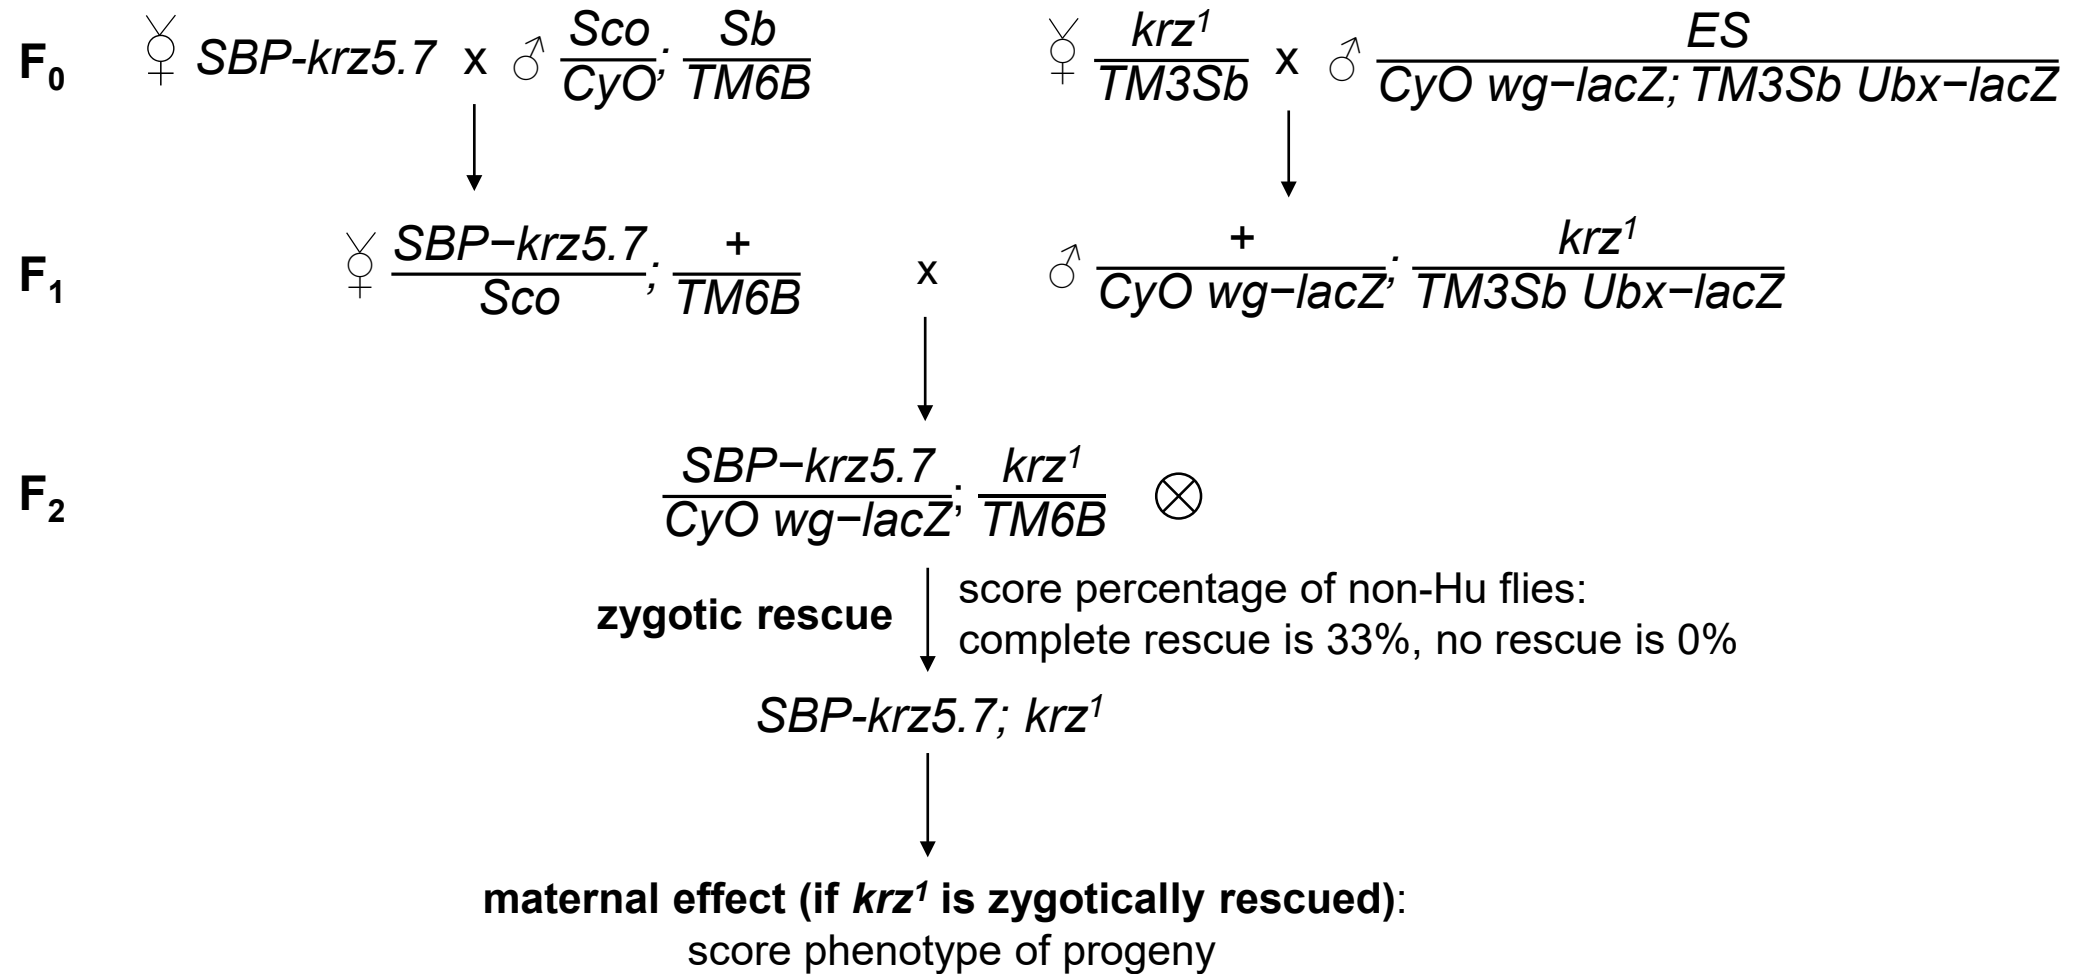

Fig. S2

Supplement: NIHMS1535480-supplement-4.pdf [file NIHMS1535480-supplement-4.pdf]

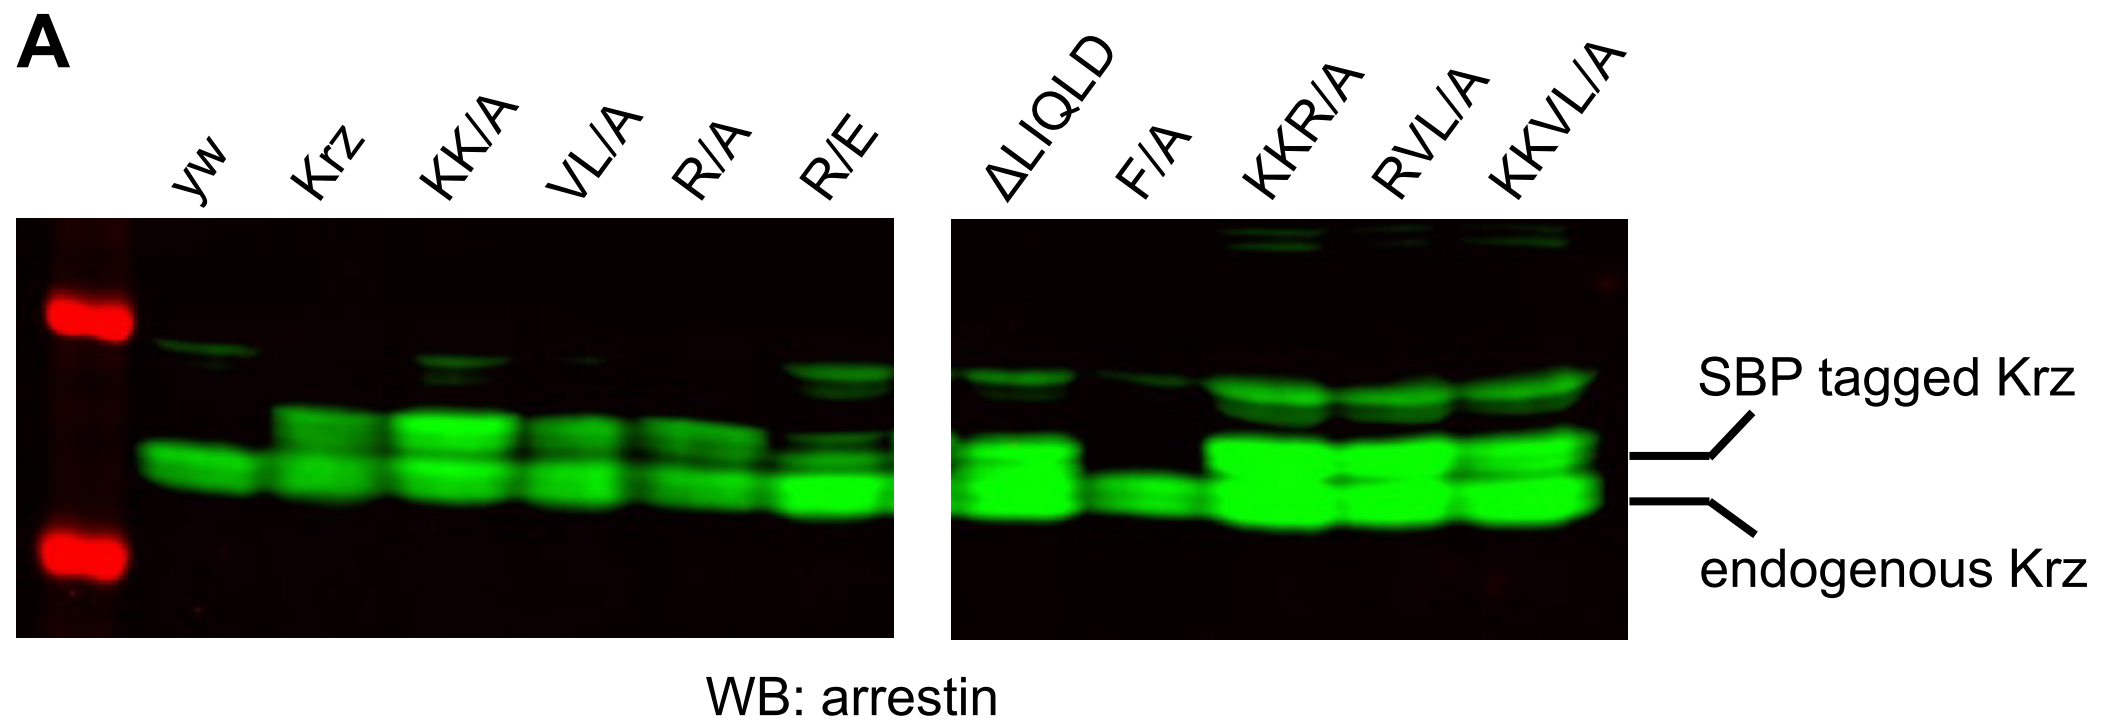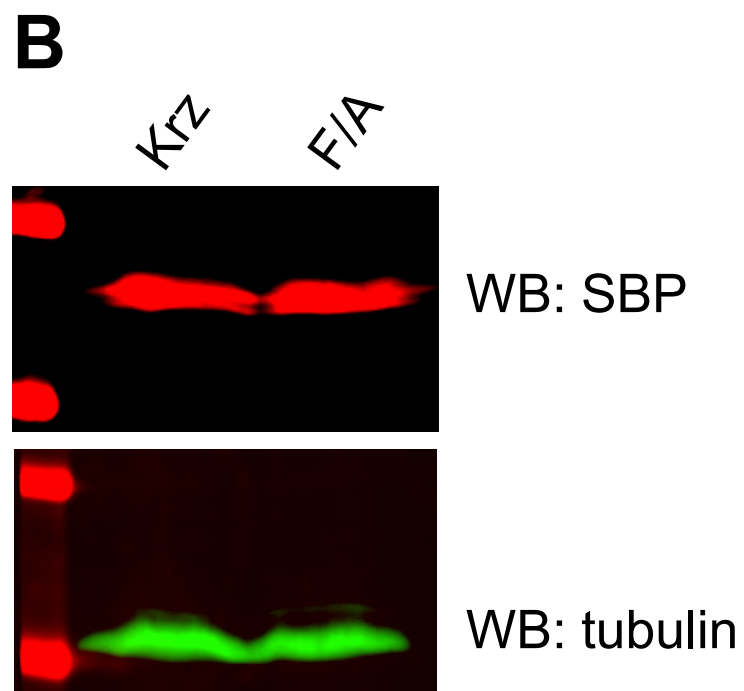

Fig. S3

Supplement: NIHMS1535480-supplement-5.pdf [file NIHMS1535480-supplement-5.pdf]

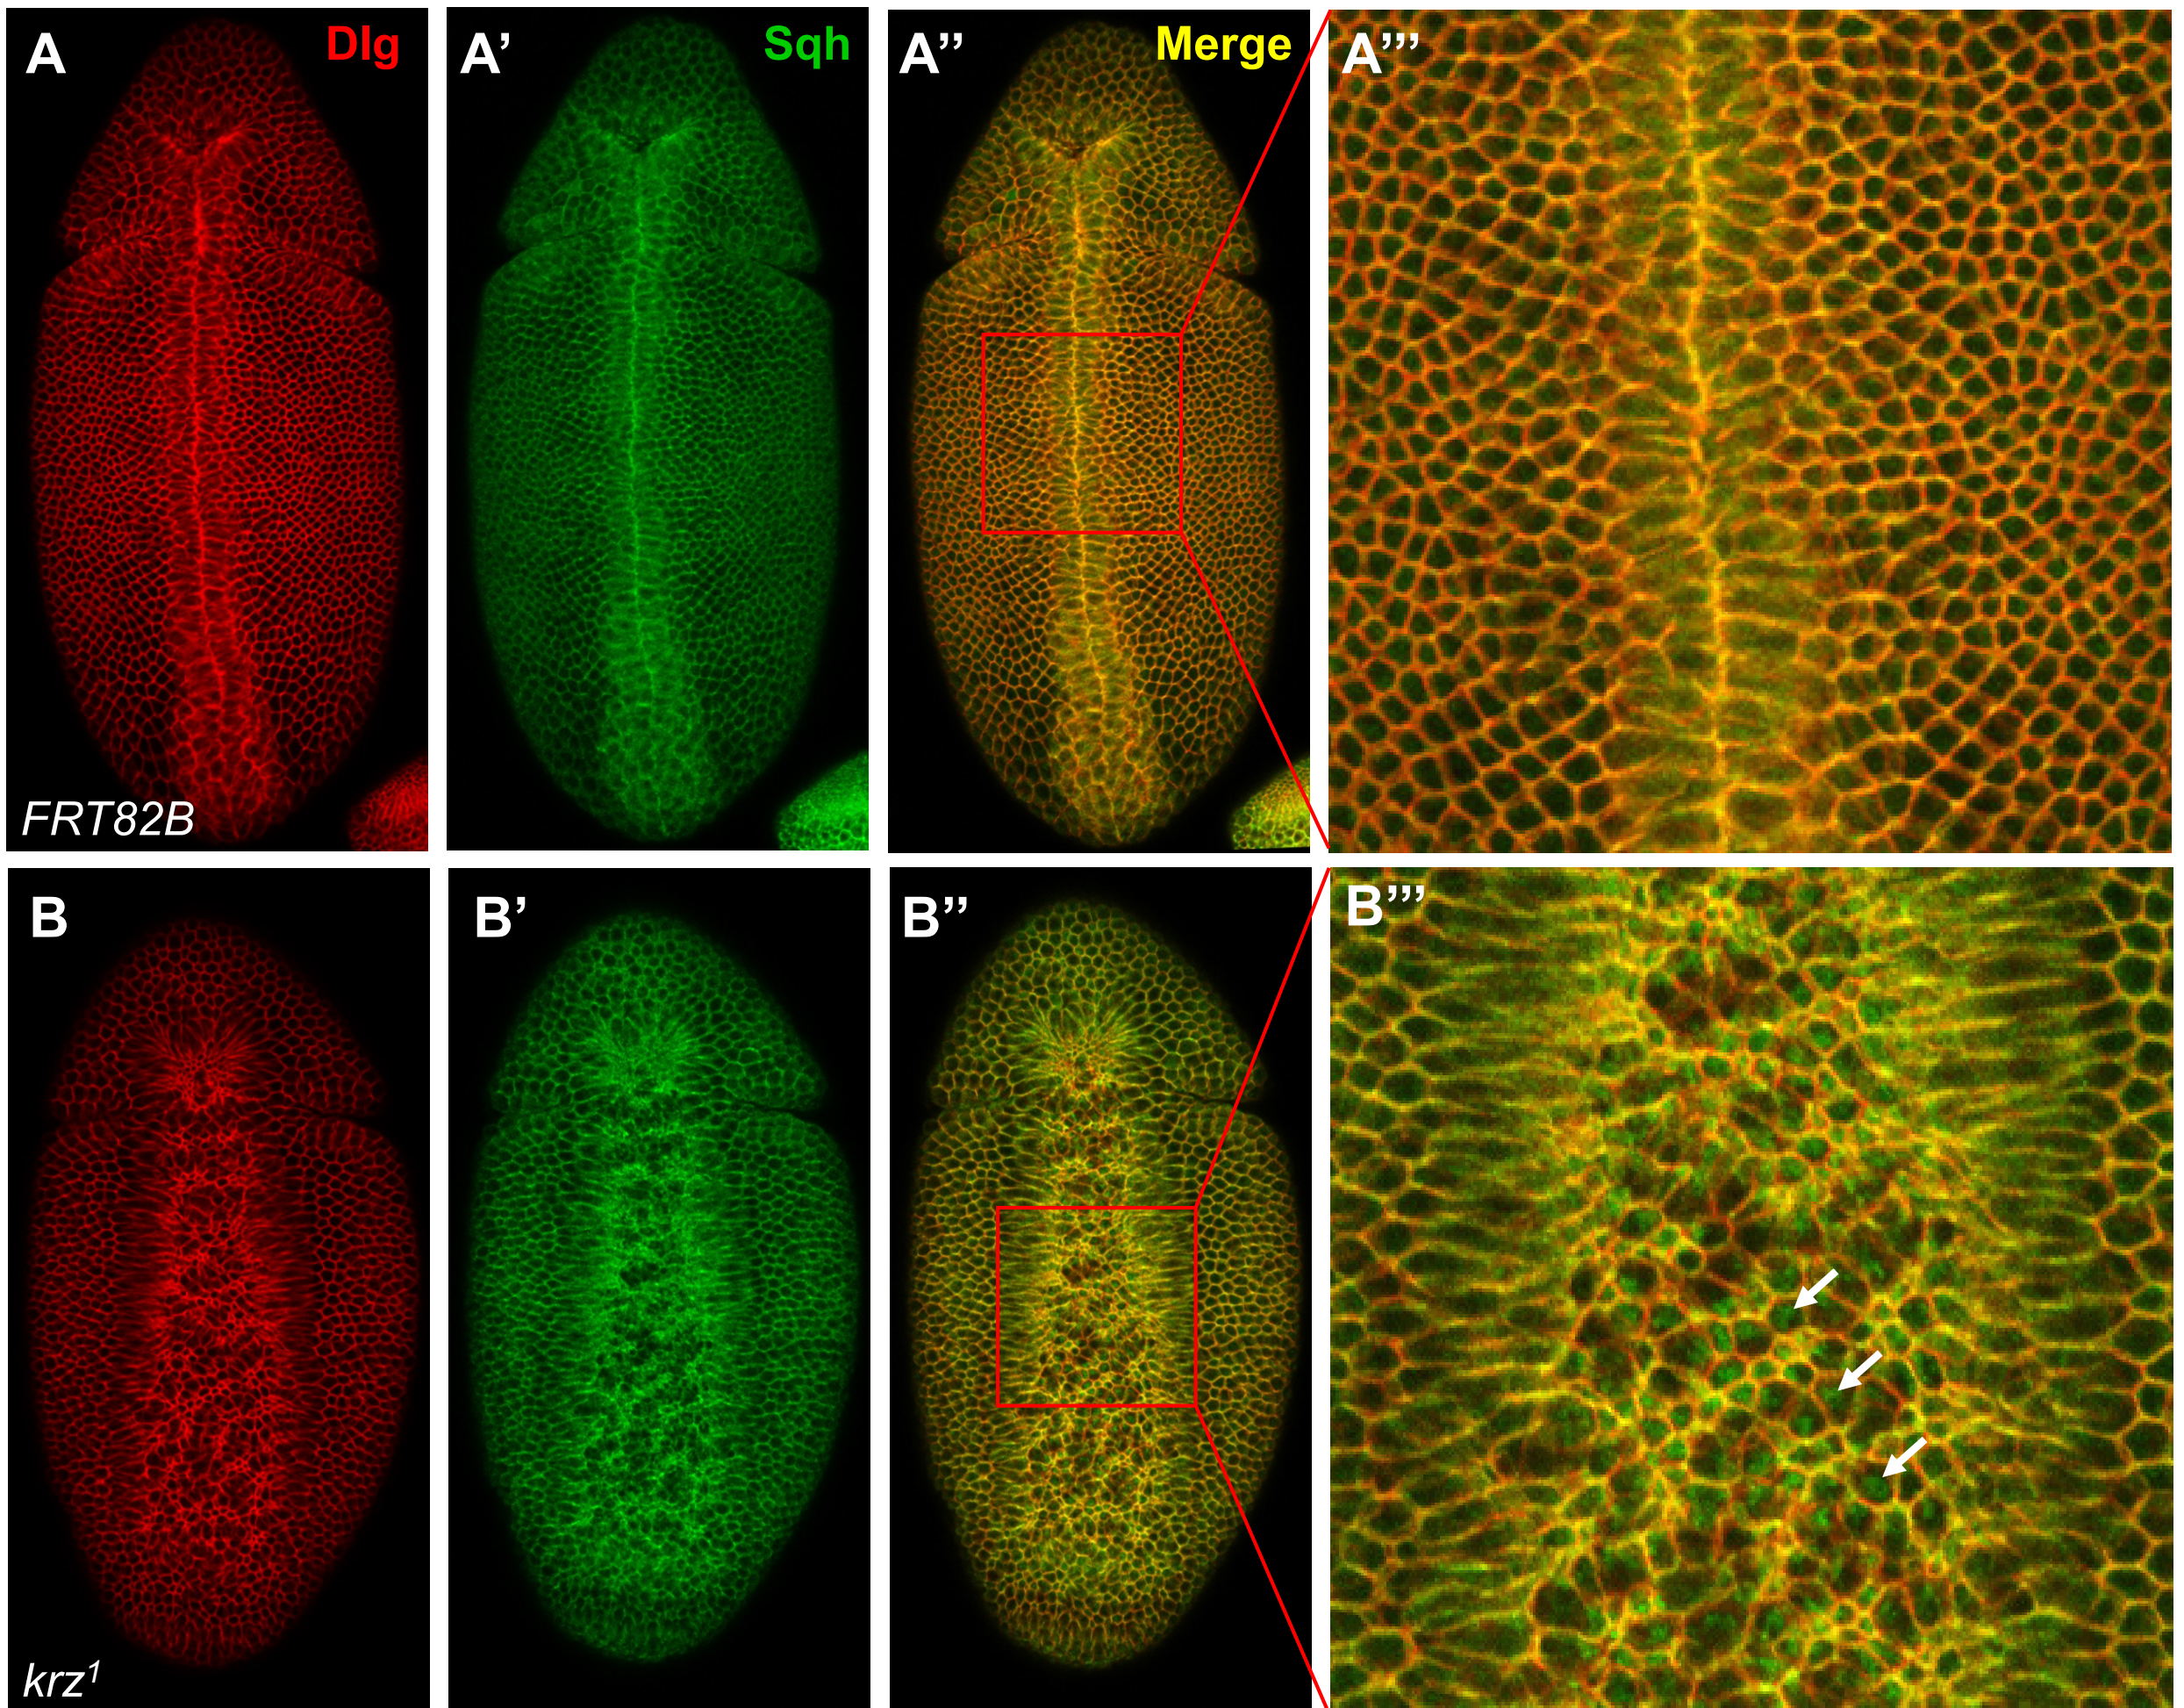

Fig. S4

Supplement: NIHMS1535480-supplement-6.pdf [file NIHMS1535480-supplement-6.pdf]

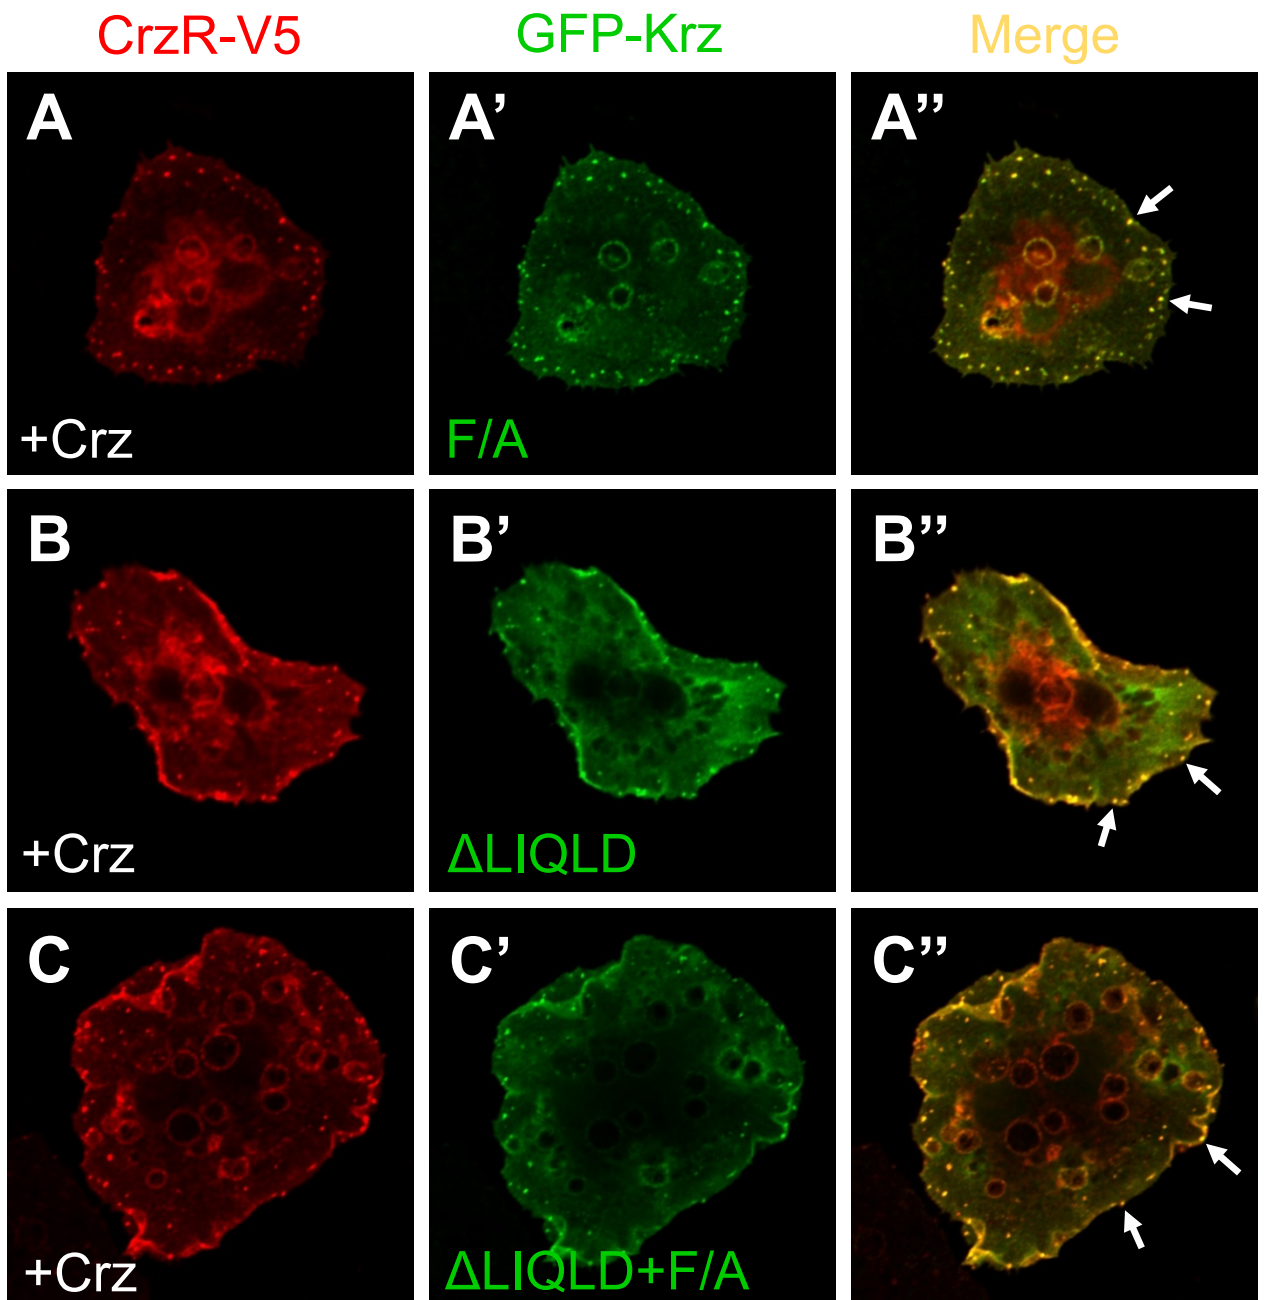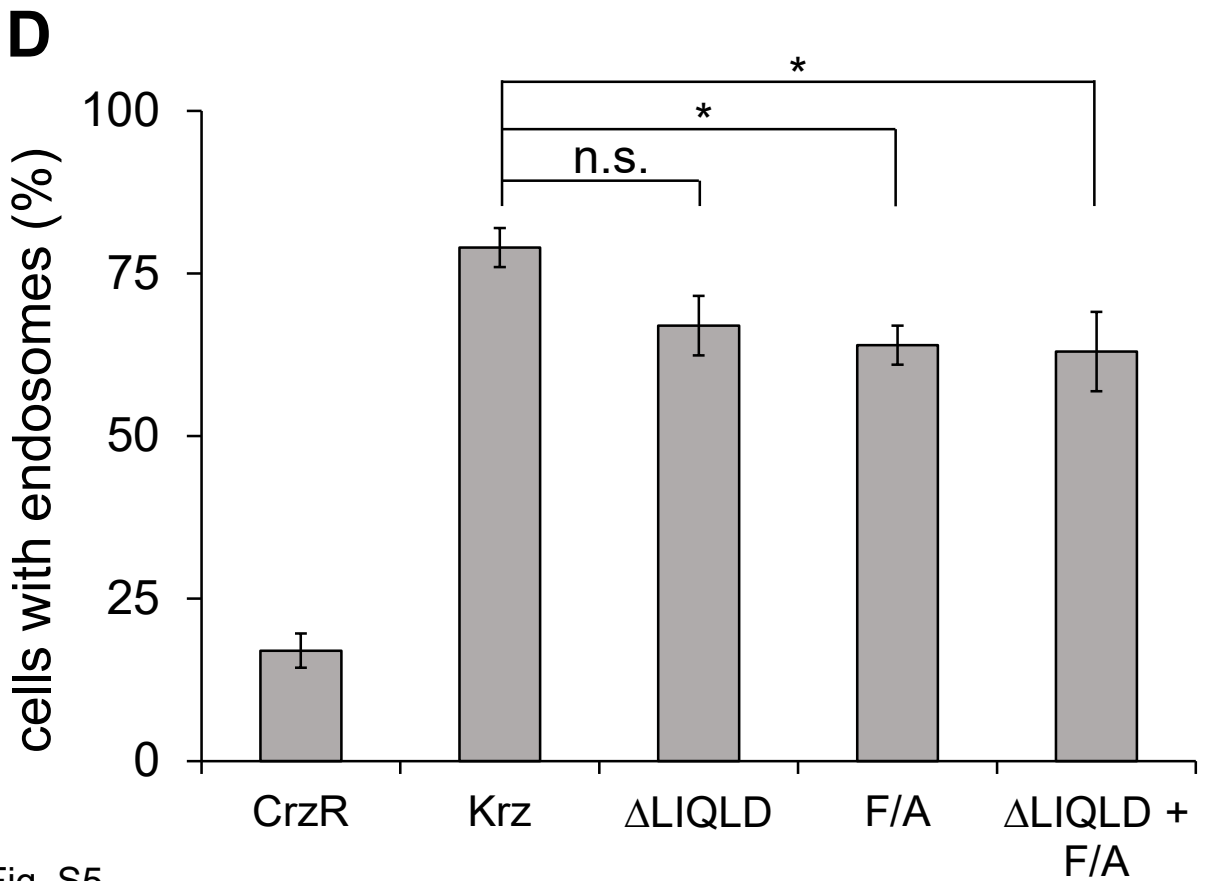

Fig. S5

Supplement: NIHMS1535480-supplement-7.pdf [file NIHMS1535480-supplement-7.pdf]
